# Supplementary material for: Pyrrole: an additive for improving the efficiency and stability of perovskite solar cells
Source: Royal Society of Chemistry journal article supplement (doi:10.1039/c9ta02916h), 2019-01-01
Supplement: c9ta02916h1.pdf [file c9ta02916h1.pdf]

## Supporting Information for

### **Pyrrole-an additives for improving the efficiency and stability of perovskite solar cells**

Xuping Liu, Jihuai Wu\*, Qiyao Guo, Yuqian Yang, Quanzhen Liu, Hui Luo, Xiaobing, Wang,  
Xin He, Miaoliang Huang, Weihai Sun, Zhang Lan

\*Correspondence to: [jhwu@hqu.edu.cn](mailto:jhwu@hqu.edu.cn)

This PDF file includes:

Figs. S1 to S7

Tables S1 to S5

---

\* Engineering Research Center of Environment-Friendly Functional Materials, Ministry of Education; Fujian Engineering Research Center of Green Functional Materials; Institute of Materials Physical Chemistry, Huaqiao University; Xiamen, Fujian 361021, China. E-mail: [jhwu@hqu.edu.cn](mailto:jhwu@hqu.edu.cn)

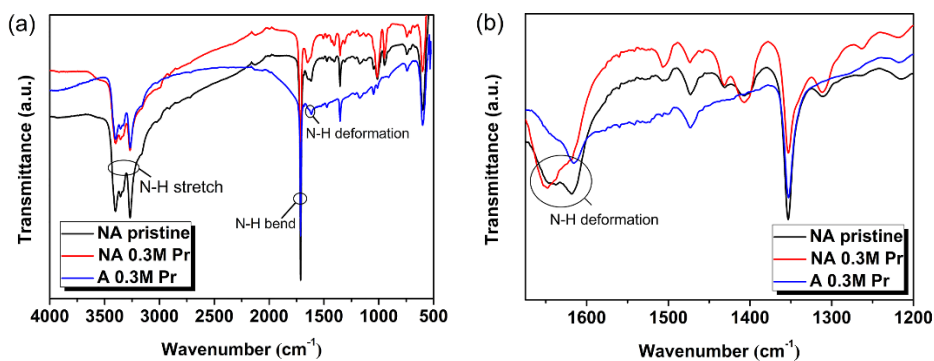

**Fig. S1** (a) FTIR spectra of the unannealed pristine film, unannealed modified film (0.3 M Pr) and annealed modified film (0.3 M Pr); (b) Magnifications of FTIR spectra of the corresponding films from the wavenumbers of 1200 $\text{cm}^{-1}$  to 1670  $\text{cm}^{-1}$ .

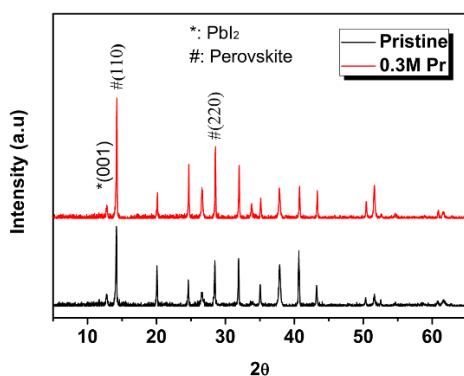

**Fig. S2** XRD patterns of the films with and without pyrrole doping.

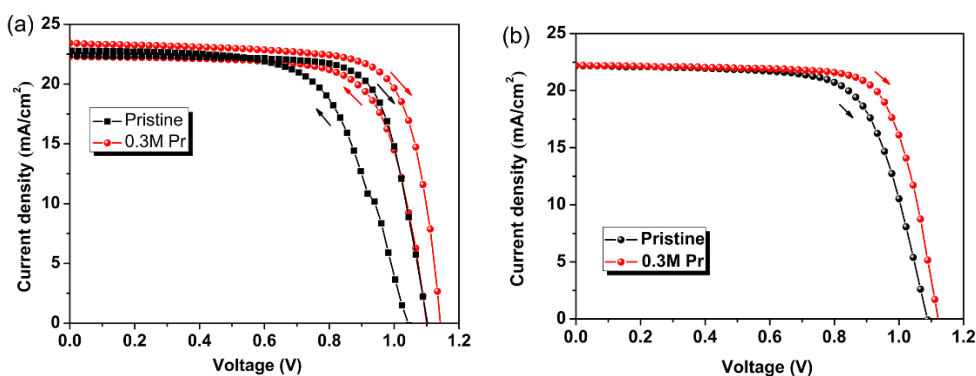

**Fig. S3** (a)  $J$ - $V$  curves of the devices with and without pyrrole doping under the forward bias scan and reverse bias scan (active area of the devices were defined as 0.1225  $\text{cm}^2$ ); (b)  $J$ - $V$  curves (reverse scan) of the devices with and without pyrrole doping (active area of the devices were defined as 0.37  $\text{cm}^2$ ), the illustration is the Photograph of a typical device on a 2.0 $\times$ 2.0  $\text{cm}^2$  substrate.

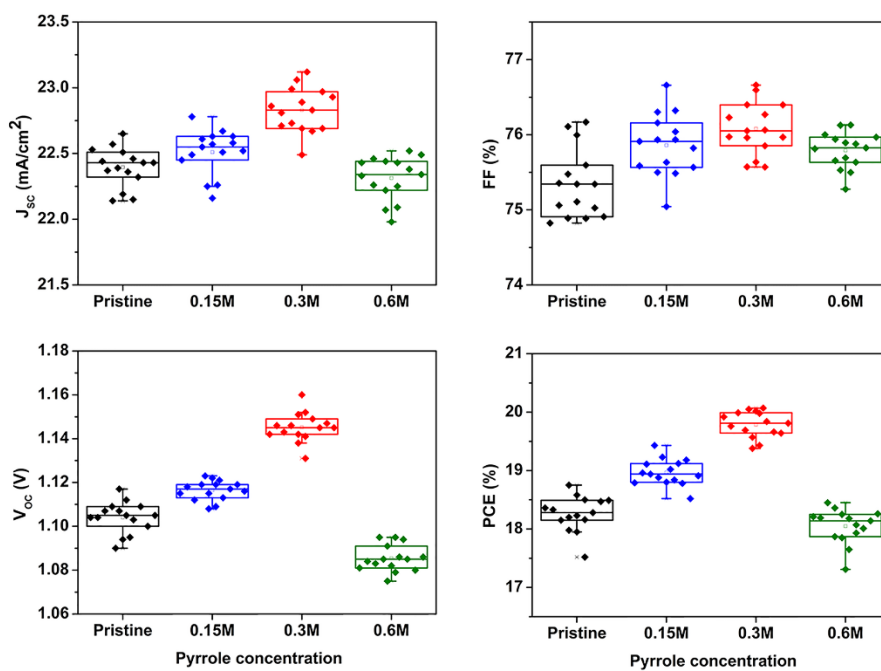

**Fig. S4** Photovoltaic parameters of 15 PSCs with the pristine film and modified films (0.15 M Pr, 0.3 M Pr and 0.6 M Pr).

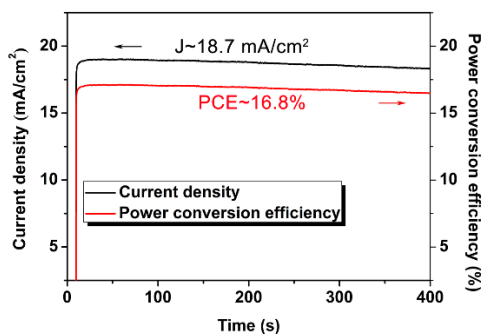

**Fig. S5** Steady-state power output characteristics and the PCE of the pristine device.

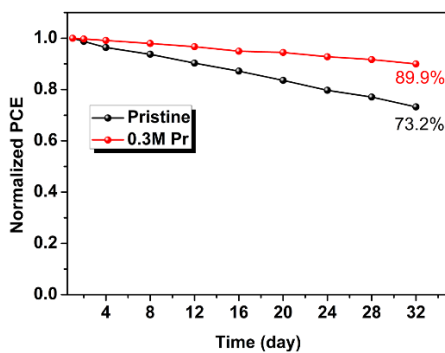

**Fig. S6** Stability evaluation of the devices with and without pyrrole doping for 32 d stored in a desiccator ( $10 \pm 5$  RH%, 25 °C).

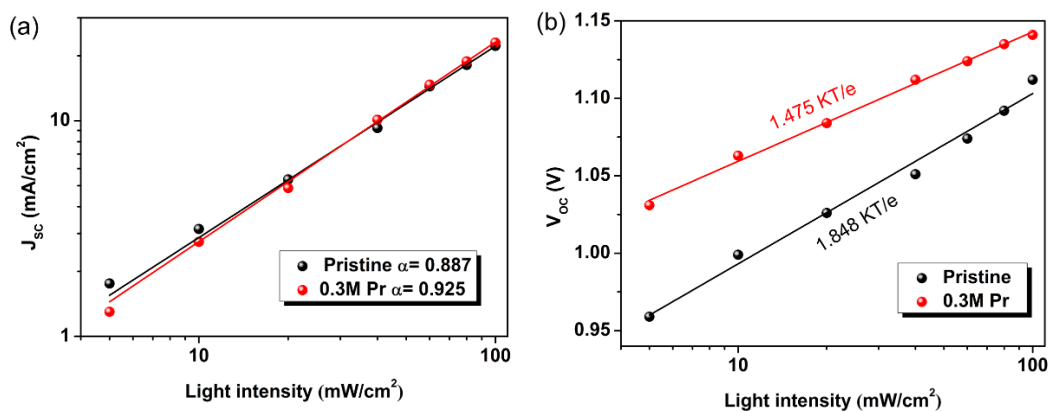

**Fig. S7** Dependence of (a)  $J_{sc}$  and (b)  $V_{oc}$  on light intensity for pristine and modified devices (0.3 M Pr).

**Table S1** Fitting parameters for the TRPL spectra by using bi-exponential function shown in Fig. 3c.

| Sample    | $A_1$ (%) | $\tau_1$ (ns) | $A_2$ (%) | $\tau_2$ (ns) | $\tau_{av}$ (ns) |
|-----------|-----------|---------------|-----------|---------------|------------------|
| Pristine  | 15.79     | 10.810        | 84.21     | 86.741        | 74.750           |
| 0.15 M Pr | 15.10     | 12.421        | 84.90     | 95.91         | 83.30            |
| 0.3 M Pr  | 10.06     | 9.619         | 89.94     | 96.613        | 87.859           |
| 0.6 M Pr  | 19.05     | 8.045         | 80.95     | 80.487        | 66.687           |

**Table S2** Photovoltaic data of the PSCs with pristine modified films (0.15 M Pr, 0.3 M Pr and 0.6 M Pr).

| Sample    | $V_{oc}$ (V) | $J_{sc}$ (mA·cm <sup>-2</sup> ) | FF   | PCE (%) |
|-----------|--------------|---------------------------------|------|---------|
| Pristine  | 1.101        | 22.26                           | 0.76 | 18.58   |
| 0.15 M Pr | 1.116        | 22.48                           | 0.77 | 19.23   |
| 0.3 M Pr  | 1.142        | 22.99                           | 0.76 | 20.02   |
| 0.6 M Pr  | 1.085        | 22.24                           | 0.76 | 18.23   |

**Table S3** Photovoltaic data of the devices with and without pyrrole doping under different scan directions.

| Sample   | Scan direction | $V_{OC}$ (V) | $J_{SC}$ ( $\text{mA}\cdot\text{cm}^{-2}$ ) | FF   | PCE (%) |
|----------|----------------|--------------|---------------------------------------------|------|---------|
| Pristine | Forward scan   | 1.044        | 22.79                                       | 0.64 | 15.17   |
|          | Reverse scan   | 1.103        | 22.41                                       | 0.75 | 18.48   |
| 0.3 M Pr | Forward scan   | 1.099        | 22.29                                       | 0.72 | 17.72   |
|          | Reverse scan   | 1.142        | 23.38                                       | 0.75 | 20.07   |

**Table S4** Photovoltaic data of the devices with and without pyrrole doping under the reverse bias scan.

| Sample   | $V_{OC}$ (V) | $J_{SC}$ ( $\text{mA}\cdot\text{cm}^{-2}$ ) | FF   | PCE (%) |
|----------|--------------|---------------------------------------------|------|---------|
| Pristine | 1.049        | 21.91                                       | 0.73 | 16.87   |
| 0.3 M Pr | 1.121        | 22.19                                       | 0.75 | 18.67   |

**Table S5** Photovoltaic performance parameters of 15 devices with the pristine and modified films.

| Sample    | Data     | $V_{OC}$ (V)      | $J_{SC}$ ( $\text{mA}\cdot\text{cm}^{-2}$ ) | FF              | PCE (%)          |
|-----------|----------|-------------------|---------------------------------------------|-----------------|------------------|
| Pristine  | Champion | 1.117             | 22.65                                       | 0.76            | 18.79            |
|           | Average  | $1.104 \pm 0.012$ | $22.39 \pm 0.25$                            | $0.75 \pm 0.01$ | $18.24 \pm 0.61$ |
| 0.15 M Pr | Champion | 1.123             | 22.78                                       | 0.77            | 19.43            |
|           | Average  | $1.116 \pm 0.007$ | $22.51 \pm 0.31$                            | $0.76 \pm 0.02$ | $18.97 \pm 0.27$ |
| 0.3 M Pr  | Champion | 1.16              | 23.12                                       | 0.77            | 20.07            |
|           | Average  | $1.145 \pm 0.014$ | $22.82 \pm 0.32$                            | $0.76 \pm 0.01$ | $19.79 \pm 0.35$ |
| 0.6 M Pr  | Champion | 1.095             | 22.52                                       | 0.76            | 18.45            |
|           | Average  | $1.085 \pm 0.01$  | $22.31 \pm 0.26$                            | $0.76 \pm 0.01$ | $18.04 \pm 0.57$ |
